# Supplementary material
Source: PubMed Central journal article supplement (PMC6314133)
Supplement: supp_RA118.005147_139814_2_supp_220382_ph3p5t.pdf [file supp_RA118.005147_139814_2_supp_220382_ph3p5t.pdf]

**Supplemental material for**

**Structural insights into methylated DNA recognition by the C-terminal zinc fingers  
of the DNA reader protein ZBTB38**

Nicholas O. Hudson<sup>1</sup>, Frank G. Whitby<sup>2</sup>, Bethany A. Buck-Koehntop<sup>1,3</sup>

<sup>1</sup>Department of Chemistry, University of Utah, Salt Lake City, Utah 84112

<sup>2</sup>Department of Biochemistry, University of Utah, Salt Lake City, Utah 84112

<sup>3</sup>To whom correspondence should be addressed: Phone: 801-581-3186; Fax: 801-581-8433; E-mail: koehntop@chem.utah.edu

Contains supplemental Tables S1-S2 and supplemental Figures S1-S4.

**Table S1.** Oligonucleotide sequences utilized for NMR, X-ray crystallography and EMSA

| <b>NMR</b>                   |                                                                    |
|------------------------------|--------------------------------------------------------------------|
| mCZ38BS_18mer_F              | 5' - <sup>1</sup> GCACTCATmCGGmCGCAGAC <sup>18</sup> -3'           |
| mCZ38BS_18mer_R              | 5' - <sup>19</sup> GTCTGmCGCmCGATGAGTGC <sup>36</sup> -3'          |
| mCZ38BS_21mer_F              | 5' - <sup>1</sup> GCACTCATmCGGmCGCAGATCAG <sup>21</sup> -3'        |
| mCZ38BS_21mer_R              | 5' - <sup>22</sup> CTGATCTGmCGCmCGATGAGTGC <sup>42</sup> -3'       |
| <b>X-ray Crystallography</b> |                                                                    |
| mCZ38BS_18mer_F              | 5' - <sup>1</sup> GCACTCATmCGGmCGCAGAC <sup>18</sup> -3'           |
| mCZ38BS_18mer_R              | 5' - <sup>19</sup> GTCTGmCGCmCGATGAGTGC <sup>36</sup> -3'          |
| <b>EMSA</b>                  |                                                                    |
| mCZ38BS_27mer_F (ATMGGMG)    | 5' - <sup>1</sup> GCACTCATmCGGmCGCAGATCAGCTAGCC <sup>27</sup> -3'  |
| mCZ38BS_27mer_R              | 5' - <sup>28</sup> GGCTAGCTGATCTGmCGCmCGATGAGTGC <sup>54</sup> -3' |
| mCZ38BS_ACMG_F (ACMGGMG)     | 5' -GCACTCACmCGGmCGCAGATCAGCTAGCC-3'                               |
| mCZ38BS_ACMG_R               | 5' -GGCTAGCTGATCTGmCGCmCGGTGAGTGC-3'                               |

**Table S2.** Summary of protein:DNA contacts between ZBTB38 ZF 6-9 and ZBTB38 ZF 6-9\_K1055R with mCZ38BS

| ZBTB38 ZF 6-9<br>(1006-1124) |      | mCZ38BS |      |              |
|------------------------------|------|---------|------|--------------|
| *Residue                     | Atom | Base    | Atom | Distance (Å) |
| Tyr-1010                     | Oη   | C2      | O1P  | 2.6/2.4      |
| Tyr-1010                     | Oη   | C2      | P    | 3.7          |
| Tyr-1010                     | Cζ   | C2      | O1P  | 3.4          |
| Lys-1017                     | Nζ   | T30     | O1P  | 3.7/2.6      |
| Ser-1021                     | Cβ   | A3      | O2P  | 3.4/3.3      |
| Pro-1022                     | Cδ   | A3      | O2P  | 3.3          |
| Pro-1022                     | Cδ   | C2      | O1P  | 3.4/3.5      |
| Ser-1023                     | N    | A3      | O2P  | 2.8          |
| Ser-1023                     | Oγ   | A3      | O2P  | 2.8          |
| Ser-1023                     | Cβ   | A3      | O2P  | 3.1          |
| Ser-1023                     | Cβ   | A3      | P    | 3.6          |
| Ser-1023                     | N    | A3      | P    | 3.7          |
| Ser-1023                     | Cβ   | A3      | C2'  | 4.2/4.1      |
| Met-1027                     | Cγ   | T30     | C7   | 4.1          |
| Met-1027                     | Sδ   | T30     | C7   | 4.2          |
| His-1028                     | Nδ1  | T30     | O2P  | 2.8/2.7      |
| His-1028                     | Nδ1  | T30     | P    | 3.5/3.6      |
| Cys-1031                     | Sγ   | A29     | O5'  | 3.4/3.3      |
| Cys-1031                     | Sγ   | A29     | C3'  | 3.8/3.6      |
| Cys-1031                     | Sγ   | A29     | P    | 3.9/3.8      |
| Cys-1031                     | Sγ   | A29     | C5'  | 4.0/3.9      |
| Cys-1031                     | Sγ   | A29     | C2'  | 4.2          |
| Arg-1045                     | Cζ   | C27     | O5'  | 3.3/3.2      |
| Arg-1045                     | Nη1  | C27     | O5'  | 3.3          |
| Arg-1045                     | Nη2  | C27     | O3'  | 3.5          |
| Arg-1045                     | Nη1  | C27     | O1P  | 3.7/3.4      |
| Arg-1045                     | Cζ   | C27     | C5'  | 3.9/4.0      |
| Arg-1045                     | Nη2  | C27     | O5'  | 3.4          |
| Arg-1045                     | Nη2  | G28     | O1P  | 4.2          |
| Phe-1047                     | Cδ2  | G28     | O2P  | 3.3          |
| Phe-1047                     | Cε2  | C27     | C5'  | 3.8/4.0      |
| Phe-1047                     | Nζ   | C27     | C5'  | 4.2          |
| Val-1049                     | Cγ2  | T30     | C7   | 3.9/4.0      |
| Val-1049                     | Cγ2  | A29     | C8   | 4.2          |
| Gly-1051                     | Cα   | C6      | C5   | 4.2          |
| Asn-1052                     | Nδ2  | A29     | N7   | 2.9          |
| Asn-1052                     | Oδ1  | A29     | N6   | 2.9/3.0      |
| Asn-1052                     | Nδ2  | G28     | C8   | 3.6/3.5      |
| Asn-1052                     | Cγ   | G28     | C8   | 4.2          |
| Asn-1052                     | Nδ2  | G28     | N7   | 3.6          |
| Gln-1054                     | Oε1  | W103    |      | 2.5          |
| W103                         |      | C6      | O1P  | 3.0          |
| Lys-1055                     | Nζ   | T8      | O4   | 2.6          |
| Lys-1055                     | Nζ   | T8      | C7   | 3.8          |
| Lys-1055                     | Nζ   | W59     |      | 2.6          |
| Lys-1055                     | Cε   | T8      | C7   | 4.2          |
| W59                          |      | G28     | C5   | 2.8          |
| Arg-1055                     | Nη2  | G28     | O6   | 2.7          |
| Arg-1055                     | Nη1  | T8      | O4   | 2.9          |

|          |     |      |     |         |
|----------|-----|------|-----|---------|
| Arg-1055 | Nη2 | G28  | N7  | 3.2     |
| Arg-1055 | Nη2 | A29  | N6  | 3.3     |
| Arg-1055 | Cζ  | G28  | O6  | 3.4     |
| Arg-1055 | Nη2 | G28  | C6  | 3.5     |
| Arg-1055 | Nη1 | G28  | O6  | 3.3     |
| Arg-1055 | Cζ  | C27  | C5  | 4.1     |
| Arg-1055 | Cζ  | C27  | 5mC | 3.8     |
| Arg-1055 | Nε  | C27  | 5mC | 3.8     |
| Arg-1055 | Nη1 | C27  | 5mC | 4.0     |
| Arg-1055 | Cδ  | C27  | 5mC | 4.0     |
| His-1056 | Nδ1 | C27  | O2P | 2.7/2.8 |
| His-1056 | Nδ1 | C27  | P   | 3.8/3.7 |
| Ile-1059 | Cδ1 | C26  | C3' | 3.8/3.6 |
| Ile-1059 | Cδ1 | C26  | C2' | 4.2     |
| Ile-1059 | Cδ1 | C26  | C5' | 4.1     |
| K1064    | Nζ  | W98  |     | 2.9     |
| W98      |     | G25  | O1P | 2.5     |
| K1064    | Nζ  | W57  |     | 2.8     |
| W57      |     | G25  | O1P | 2.6     |
| Lys-1073 | Nζ  | W121 |     | 2.6     |
| W121     |     | G25  | O1P | 2.8     |
| Phe-1075 | Cδ2 | G25  | O2P | 3.5     |
| Leu-1077 | Cδ1 | C27  | 5mC | 3.7/3.8 |
| Asn-1078 | Nδ2 | A7   | O1P | 3.4     |
| Glu-1079 | Oε2 | C27  | N4  | 2.8     |
| Glu-1079 | Oε2 | C9   | N4  | 2.9     |
| Glu-1079 | Oε2 | C9   | 5mC | 3.7/3.5 |
| Glu-1079 | Oε1 | T8   | C7  | 3.6/3.7 |
| Glu-1079 | Cβ  | C9   | 5mC | 3.8     |
| Glu-1079 | Oε2 | C27  | 5mC | 4.0/3.9 |
| Glu-1079 | Cδ  | C27  | C7  | 4.2     |
| Glu-1079 | Cδ  | C9   | 5mC | 4.2/4.1 |
| Glu-1079 | Cβ  | C9   | 5mC | 3.8     |
| Glu-1079 | Cδ  | T8   | C7  | 4.1     |
| Glu-1079 | Cβ  | T8   | C7  | 4.2     |
| Thr-1080 | Cγ2 | C24  | C2' | 4.1     |
| Lys-1082 | Nζ  | T8   | O2P | 2.6/2.7 |
| Ile-1083 | Cγ2 | C24  | 5mC | 4.1/4.0 |
| His-1084 | Nδ1 | C24  | O2P | 2.7/2.5 |
| His-1084 | Nδ1 | C24  | P   | 3.7/3.7 |
| Ile-1087 | Cδ1 | G23  | C3' | 4.1/4.0 |
| Arg-1093 | Nη1 | C9   | O2P | 2.7/2.8 |
| Arg-1093 | Nη1 | C9   | P   | 3.7     |
| Arg-1093 | Nη2 | C9   | O2P | 3.9     |
| Arg-1093 | Nη1 | C9   | O1P | 4.1/4.0 |
| Tyr-1094 | Oη  | G10  | O2P | 3.1/2.5 |
| Tyr-1105 | Oη  | G23  | O2P | 2.7/2.6 |
| Tyr-1105 | Cε2 | T22  | C2' | 3.7     |
| Tyr-1105 | Oη  | G23  | P   | 3.7/3.6 |
| Tyr-1105 | Cε2 | T22  | C3' | 3.8     |
| Tyr-1105 | Cε1 | C24  | 5mC | 3.8     |
| Tyr-1105 | Cζ  | G23  | C8  | 3.9/4.1 |
| Tyr-1105 | Cζ  | T22  | C2' | 4.0/4.1 |
| Tyr-1105 | Cε1 | G23  | C8  | 4.1     |
| Tyr-1105 | Cζ  | G23  | O2P | 3.4     |
| Tyr-1105 | Cε2 | G23  | O2P | 3.4     |

|          |     |     |     |         |
|----------|-----|-----|-----|---------|
| Leu-1106 | Cδ2 | G10 | C3' | 4.1     |
| Leu-1106 | Cδ2 | G10 | C2' | 4.2     |
| Ser-1107 | Oγ  | T22 | C7  | 3.7     |
| Thr-1108 | Oγ1 | T22 | O2P | 2.7/2.6 |
| Thr-1108 | Cβ  | T22 | O2P | 3.4     |
| Thr-1108 | Cγ2 | C21 | C3' | 4.1/4.0 |
| Arg-1110 | Nη1 | G11 | O2P | 3.5     |
| Asn-1111 | Nδ2 | C21 | O2P | 2.7     |
| Asn-1111 | Cβ  | C21 | O2P | 3.4     |
| Arg-1115 | Nη2 | C21 | O1P | 3.0     |
| Arg-1115 | Nη2 | C21 | O2P | 4.2     |
| Arg-1115 | Nη1 | C21 | O1P | 3.1/3.2 |
| Arg-1115 | Nη2 | T20 | O3' | 3.1     |
| Arg-1115 | Nη2 | C21 | P   | 3.6     |

\*Contacts shared between the two structures are shown in black, while contacts and distances unique to the WT structure or the K1055R variant are shown in red and blue, respectively.

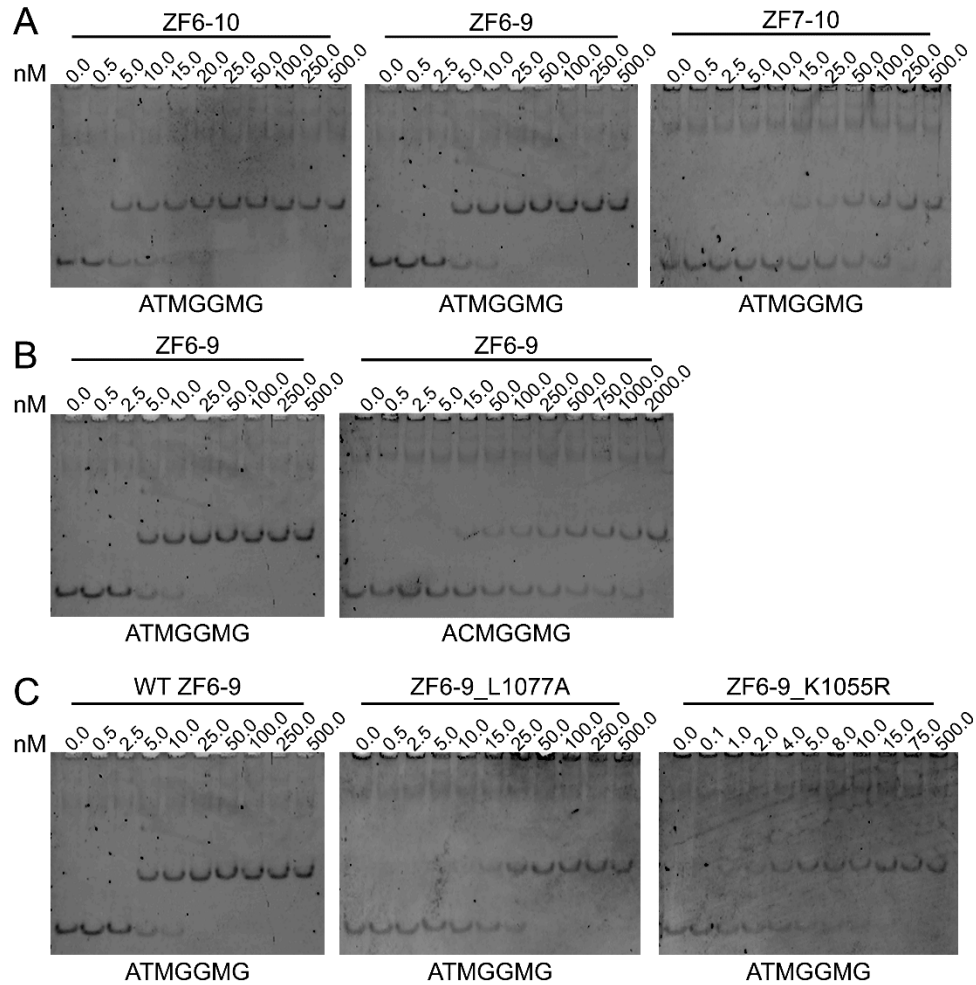

**Figure S1.** Representative EMSA gels for the binding isotherms depicted in Figures 1D (A), 3B (B), and 3D/4B (C). The wild-type (WT) ZF6-9 in complex with the mCZ38BS\_27mer from (A) is reproduced in (B) and (C) for comparative purposes. M denotes a methylated cytosine.

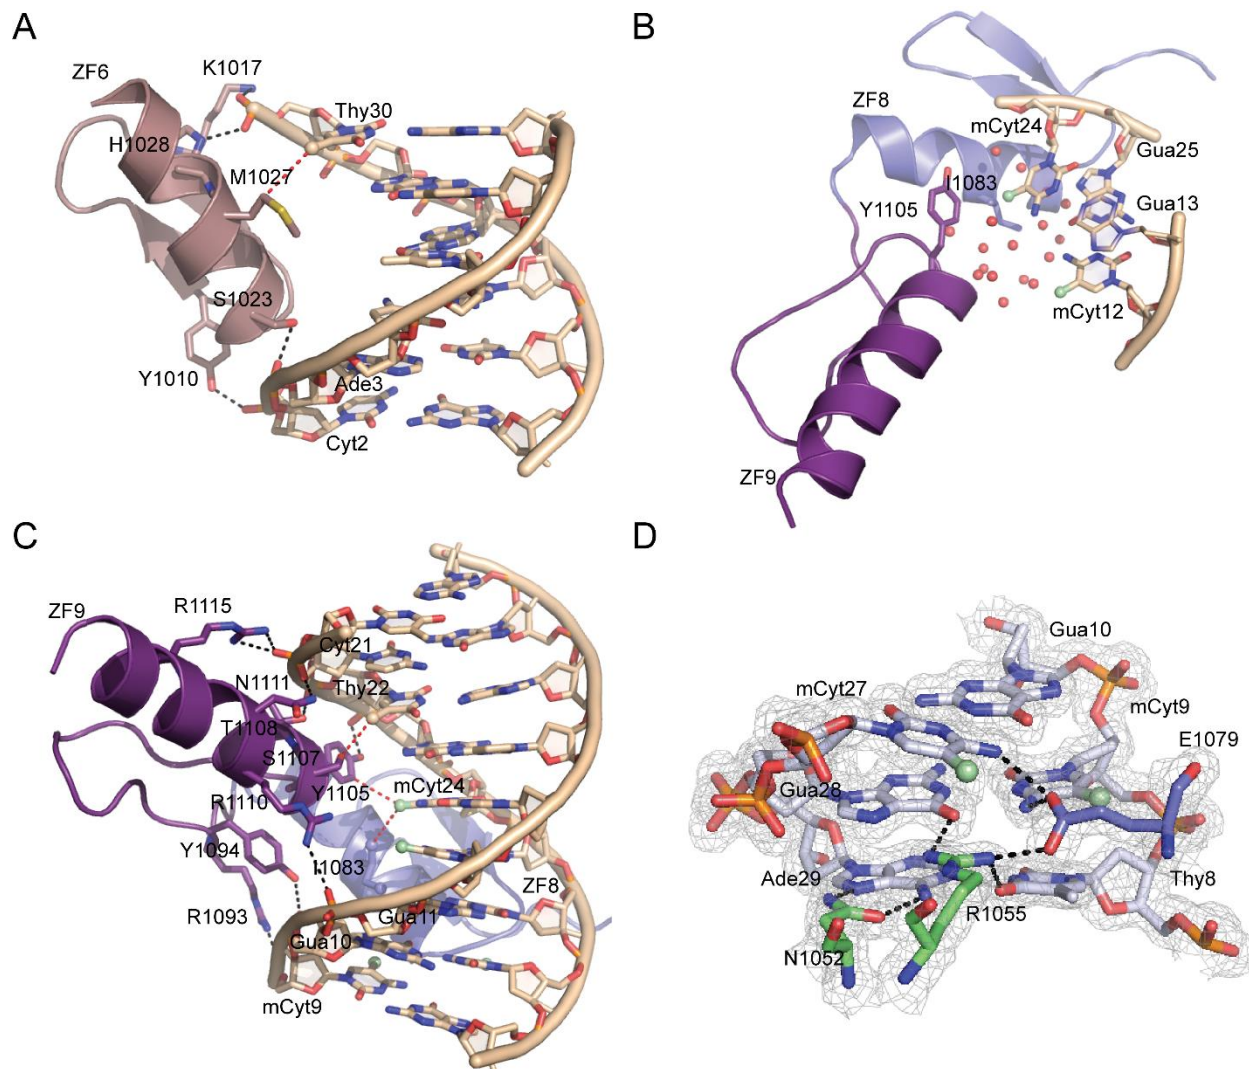

**Figure S2.** *A*, Summary of interactions for ZF6 with the mCZ38BS. *B*, Image depicting the solvation layer surrounding the 3'-mCpG site (red spheres). *C*, Summary of interactions for ZF9 with the mCZ38BS. A side chain interaction between I1083 in ZF8 and mC24 is also depicted. *D*, Interactions between Asn-1052, Arg-1055 and Glu-1079 with the core T8:A29, mC9:G28 and G10:mC27 base pairs. Electron densities ( $2F_o - F_c$ ) contoured at  $1\sigma$  are shown. For all panels, black dotted lines depict classical H-bond interactions, while red dotted lines represent van der Waals interactions.

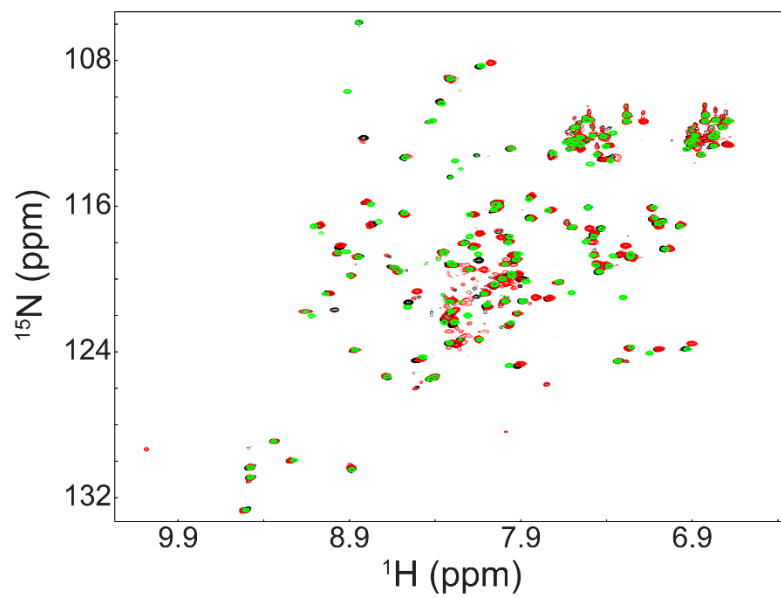

**Figure S3.**  $^1\text{H}/^{15}\text{N}$  HSQC spectral overlay of WT ZBTB38 ZFs 6-9 (black), the K1055R (red) and L1077A (green) variants, indicating that the respective point mutations do not disrupt protein structural integrity.



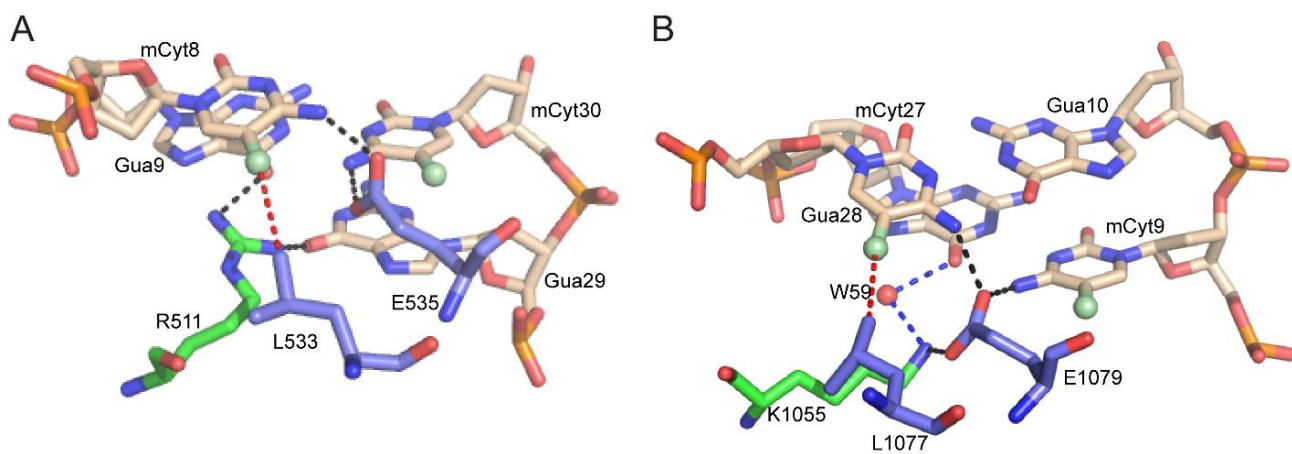

**Figure S4.** Comparison of the core mCpG recognition between the ZBTB33:MeECad complex (A, PDB ID: 4F6N) and the ZBTB38 ZF 6-9:mCZ38BS complex (B). Black dotted lines represent classical hydrogen bond interactions, blue dotted lines represent water mediated hydrogen bonds and red dotted lines represent van der Waals interactions.
